# Supplementary material
Source: publisher figshare collection journal article supplement (https://aacr.figshare.com/articles/dataset/_/22474487)
Supplement: Supplementary file 1 [file 39925982]

**A**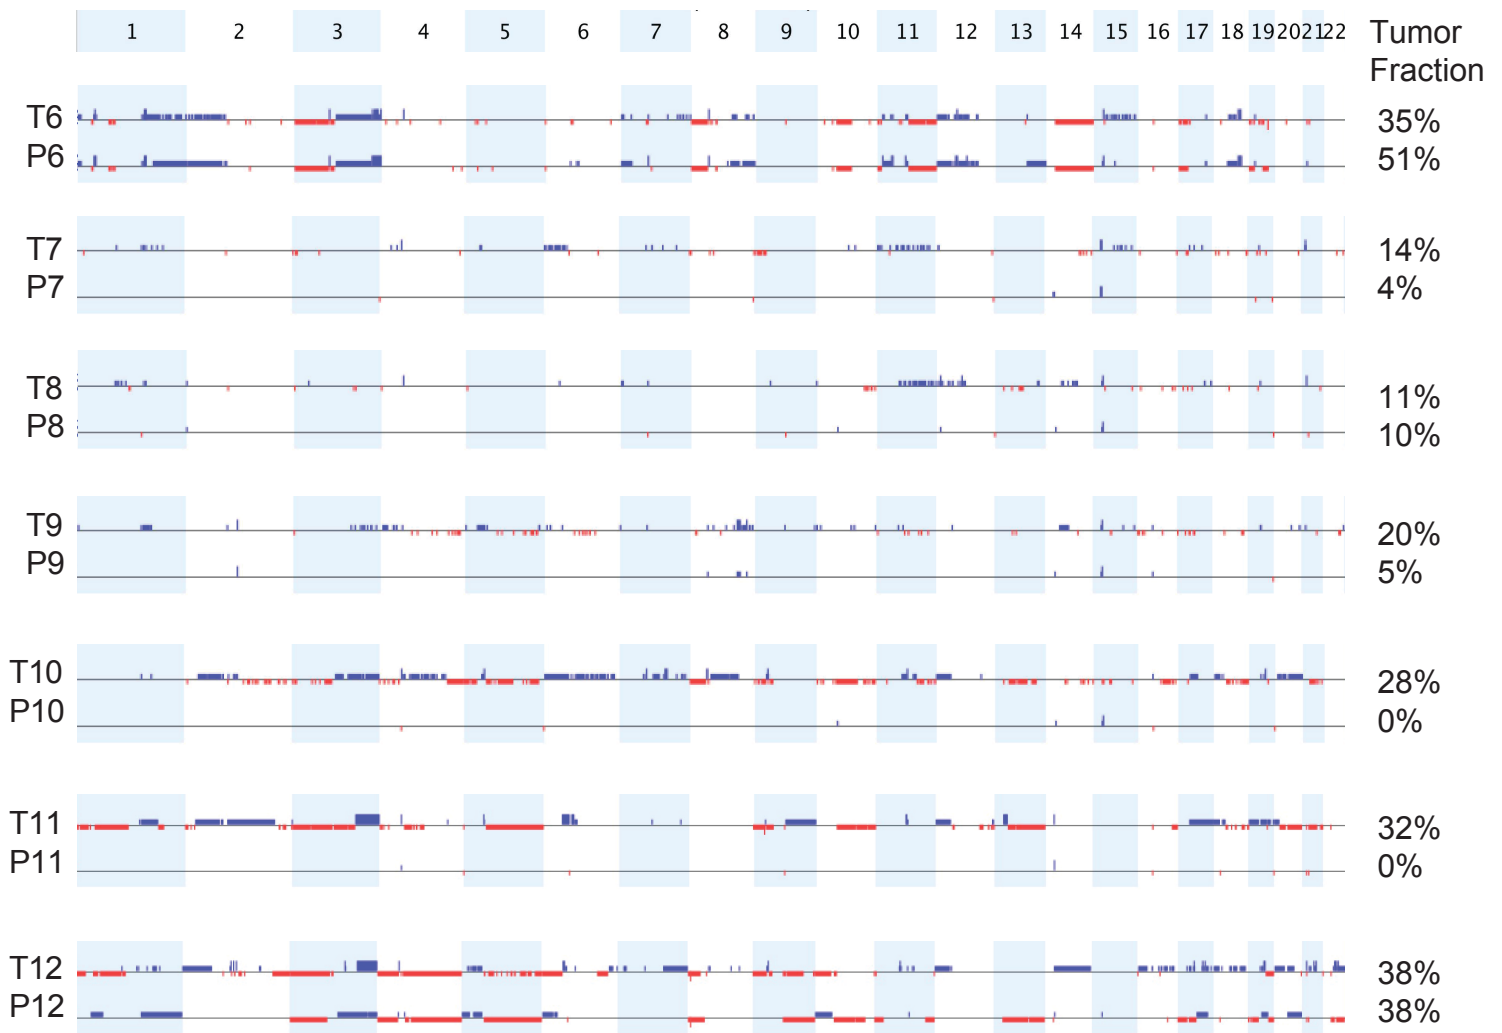**B**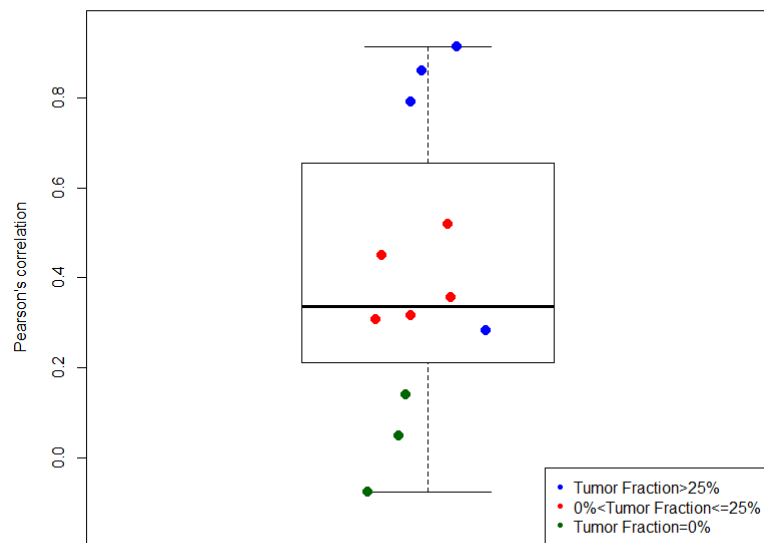

**C**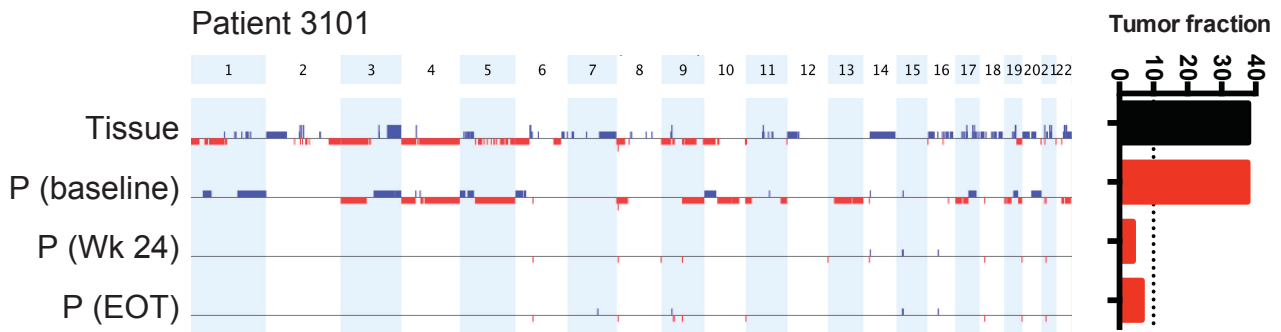**D**

| Samples      | Correlation to 3101P (baseline) |
|--------------|---------------------------------|
| 3101P (Wk24) | 0.97                            |
| 3101P (EOT)  | 0.95                            |
| 3101 Tissue  | 0.95                            |
| 3057P        | 0.41                            |
| 2758P        | 0.38                            |

**E**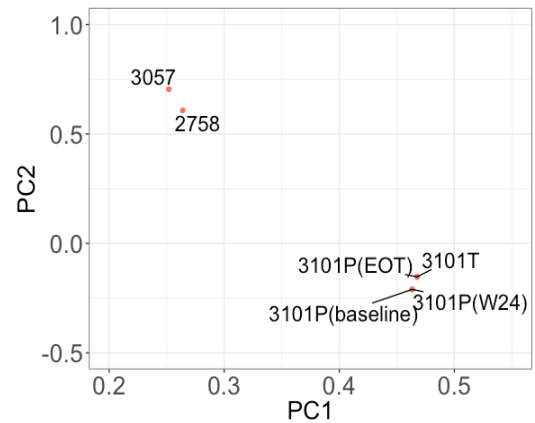**Figure 4S.**

Comparison of CNV landscapes in tumor tissue and cfDNA of the FIGARO squamous NSCLC patients. **A**, Representative LP-WGS profiles of archival tissue (T6-T12) and matched baseline cfDNA (P6-P12). Blue, copy number gain; red, copy number loss. Estimated tumor fraction indicated for each sample. **B**, Pearson correlation values for all 12 plasma and tissue pairs, color coded by cfDNA tumor fraction. Plasma tumor pair number 12 (patient 3101) has plasma tumor fraction >25% but low Pearson correlation. **C**, CNV landscape of patient 3101 tissue and plasma at baseline, week 24 (Wk24), and end of treatment (EOT). **(D-E)** Single nucleotide polymorphism (SNP) genotyping confirmed that tissue and plasma came from the same patient. cfDNA from two different patients included for comparison. **D**, correlation scores. **E**, Principal Component Analysis (PCA) score plot.
